# Supplementary material for: Place uniformity and drift in the Suzhounese fricative and apical vowels
Source: publisher site journal article supplement (doi:10.1515/lingvan-2021-0071), 2022-05-06
Supplement: Supplementary file 1 [file supplement-figs-faytak.pdf › supplement-figs-faytak.pdf]

## Supplemental figures and tables

Matthew Faytak, "Place uniformity and drift in the Suzhounese fricative and apical vowels"

Table 1. Stimuli; additional fricative onset tokens from [ɕjæ<sup>44</sup>] 箫 'flute',  
[ɕy<sup>44</sup>] 靴 'boot', [ɕy<sup>44</sup>] 修 'repair', [so<sup>44</sup>] 沙 'sand', and [sæ<sup>44</sup>] 烧 'roast'.

|      | No fricative onset           |                               | Fricative onset            |                             |
|------|------------------------------|-------------------------------|----------------------------|-----------------------------|
|      | Ø onset                      | /p/ onset                     | /ɕ/ onset                  | /s/ onset                   |
| /i̯/ | iɿ <sup>44</sup> 衣 'clothes' | piɿ <sup>51</sup> 比 'compare' | ɕiɿ <sup>44</sup> 稀 'rare' | siɿ <sup>44</sup> 西 'west'  |
| /y̯/ | yɿ <sup>44</sup> 迂 'winding' |                               | ɕyɿ <sup>44</sup> 虚 'weak' |                             |
| /ɥ/  |                              |                               |                            | sɿ <sup>44</sup> 丝 'thread' |
| [ʋ]  |                              |                               |                            | sɿ <sup>44</sup> 书 'book'   |
| /i/  | i <sup>44</sup> 烟 'smoke'    | pi <sup>44</sup> 边 'side'     | ɕi <sup>44</sup> 掀 'upend' | si <sup>44</sup> 鲜 'fresh'  |

Table 2. Place-voicing model fixed effects.

|                           | β        | SE     | <i>t</i> | <i>p</i> ( <i>t</i> ) |     |
|---------------------------|----------|--------|----------|-----------------------|-----|
| Intercept                 | 9754.53  | 156.77 | 62.222   | < 0.001               | *** |
| place -ant                | -2451.04 | 151.09 | -16.223  | < 0.001               | *** |
| voice +voi                | -210.48  | 65.22  | -3.227   | 0.00126               | **  |
| cohort post               | 156.68   | 250.35 | 0.626    | 0.535                 |     |
| gender male               | -1373.04 | 328.60 | -4.178   | < 0.001               | *** |
| place -ant * voice +voi   | -682.06  | 75.79  | -9.000   | < 0.001               | *** |
| place -ant * cohort post  | -136.50  | 241.03 | -0.566   | 0.574                 |     |
| voice +voi * cohort post  | -485.09  | 101.12 | -4.797   | < 0.001               | *** |
| place -ant * gender male  | 699.30   | 317.09 | 2.205    | 0.0331                | *   |
| voice +voi * gender male  | -606.51  | 138.96 | -4.365   | < 0.001               | *** |
| cohort post * gender male | 585.43   | 429.14 | 1.364    | 0.180                 |     |

|                                       |         |        |        |         |    |
|---------------------------------------|---------|--------|--------|---------|----|
| plc -ant * voi +voi * cht post        | 148.41  | 117.87 | 1.259  | 0.208   |    |
| plc -ant * voi +voi * gen male        | 156.94  | 161.82 | 0.970  | 0.332   |    |
| plc -ant * cht post * gen male        | -265.80 | 413.70 | -0.642 | 0.524   |    |
| voi +voi * cht post * gen male        | 497.71  | 177.40 | 2.806  | 0.00503 | ** |
| pl -ant * vo +voi * ct post * gn male | 137.32  | 207.32 | 0.662  | 0.508   |    |

Table 3. Place-rounding model fixed effects.

|                                      | $\beta$  | SE     | $t$     | $p(t)$  |     |
|--------------------------------------|----------|--------|---------|---------|-----|
| Intercept                            | 9562.43  | 234.19 | 40.833  | < 0.001 | *** |
| place -ant                           | -3134.12 | 228.17 | -13.736 | < 0.001 | *** |
| round +rd                            | -2885.54 | 101.04 | -28.557 | <0.001  | *** |
| cohort post                          | -368.84  | 372.55 | -0.990  | 0.328   |     |
| gender male                          | -2009.84 | 492.29 | -4.083  | < 0.001 | *** |
| place -ant * round +rd               | 2407.55  | 118.47 | 20.322  | < 0.001 | *** |
| place -ant * cohort post             | 61.45    | 362.95 | 0.169   | 0.866   |     |
| round +rd * cohort post              | -333.07  | 161.33 | -2.064  | 0.0391  | *   |
| place -ant * gender male             | 872.11   | 479.74 | 1.818   | 0.0757  |     |
| round +rd * gender male              | 2458.96  | 216.44 | 11.361  | < 0.001 | *** |
| cohort post * gender male            | 1106.92  | 640.72 | 1.728   | 0.0911  |     |
| plc -ant * rnd +rd * cht post        | 802.18   | 189.10 | 4.242   | < 0.001 | *** |
| plc -ant * rnd +rd * gen male        | -1288.04 | 253.02 | -5.091  | < 0.001 | *** |
| plc -ant * cht post * gen male       | -175.49  | 624.62 | -0.281  | 0.780   |     |
| rnd +rd * cht post * gen male        | -620.91  | 279.88 | -2.219  | 0.0266  | *   |
| pl -ant * rd +rd * ct post * gn male | 248.28   | 329.19 | 0.754   | 0.451   |     |

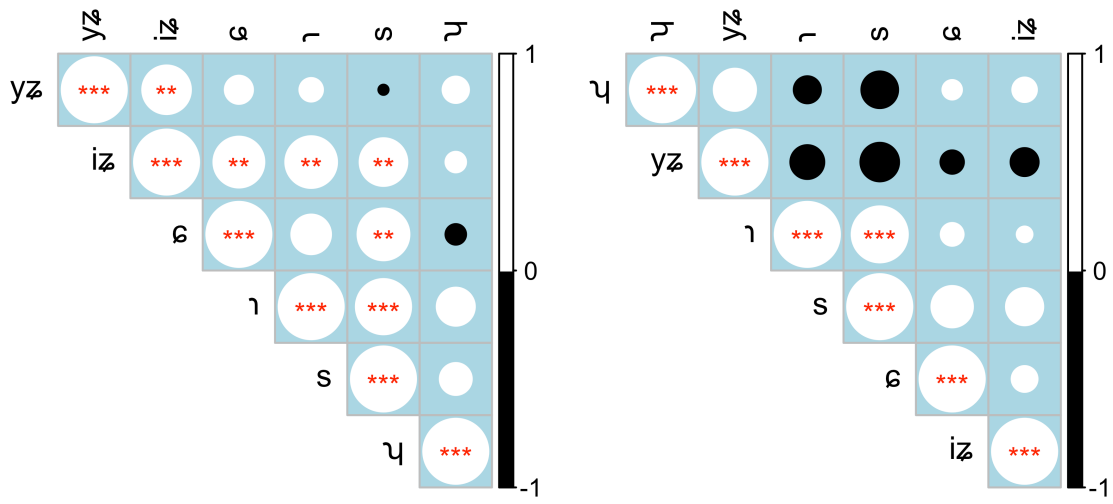

Figure 4. CoG correlograms for pre-1985 cohort (L) and post-1985 cohort (R).

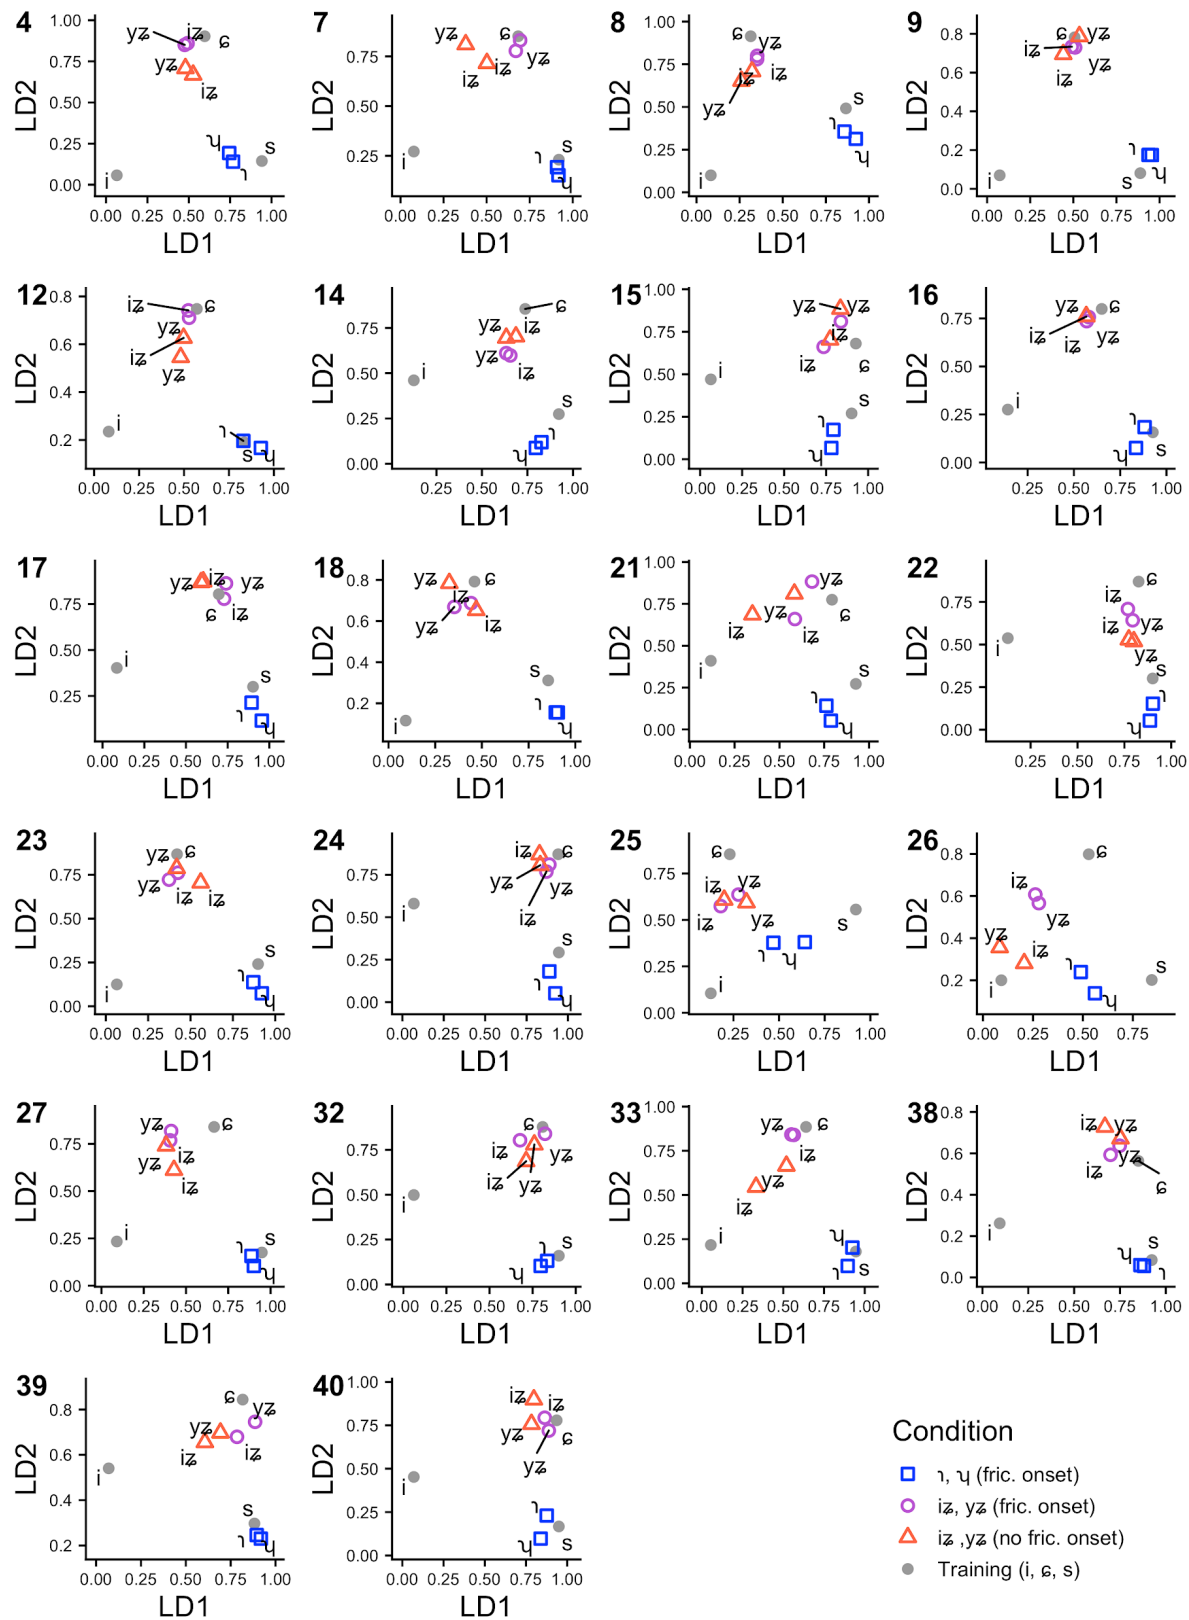

Figure 5. Range-normalized LD1-LD2 spaces for pre-1985 cohort.

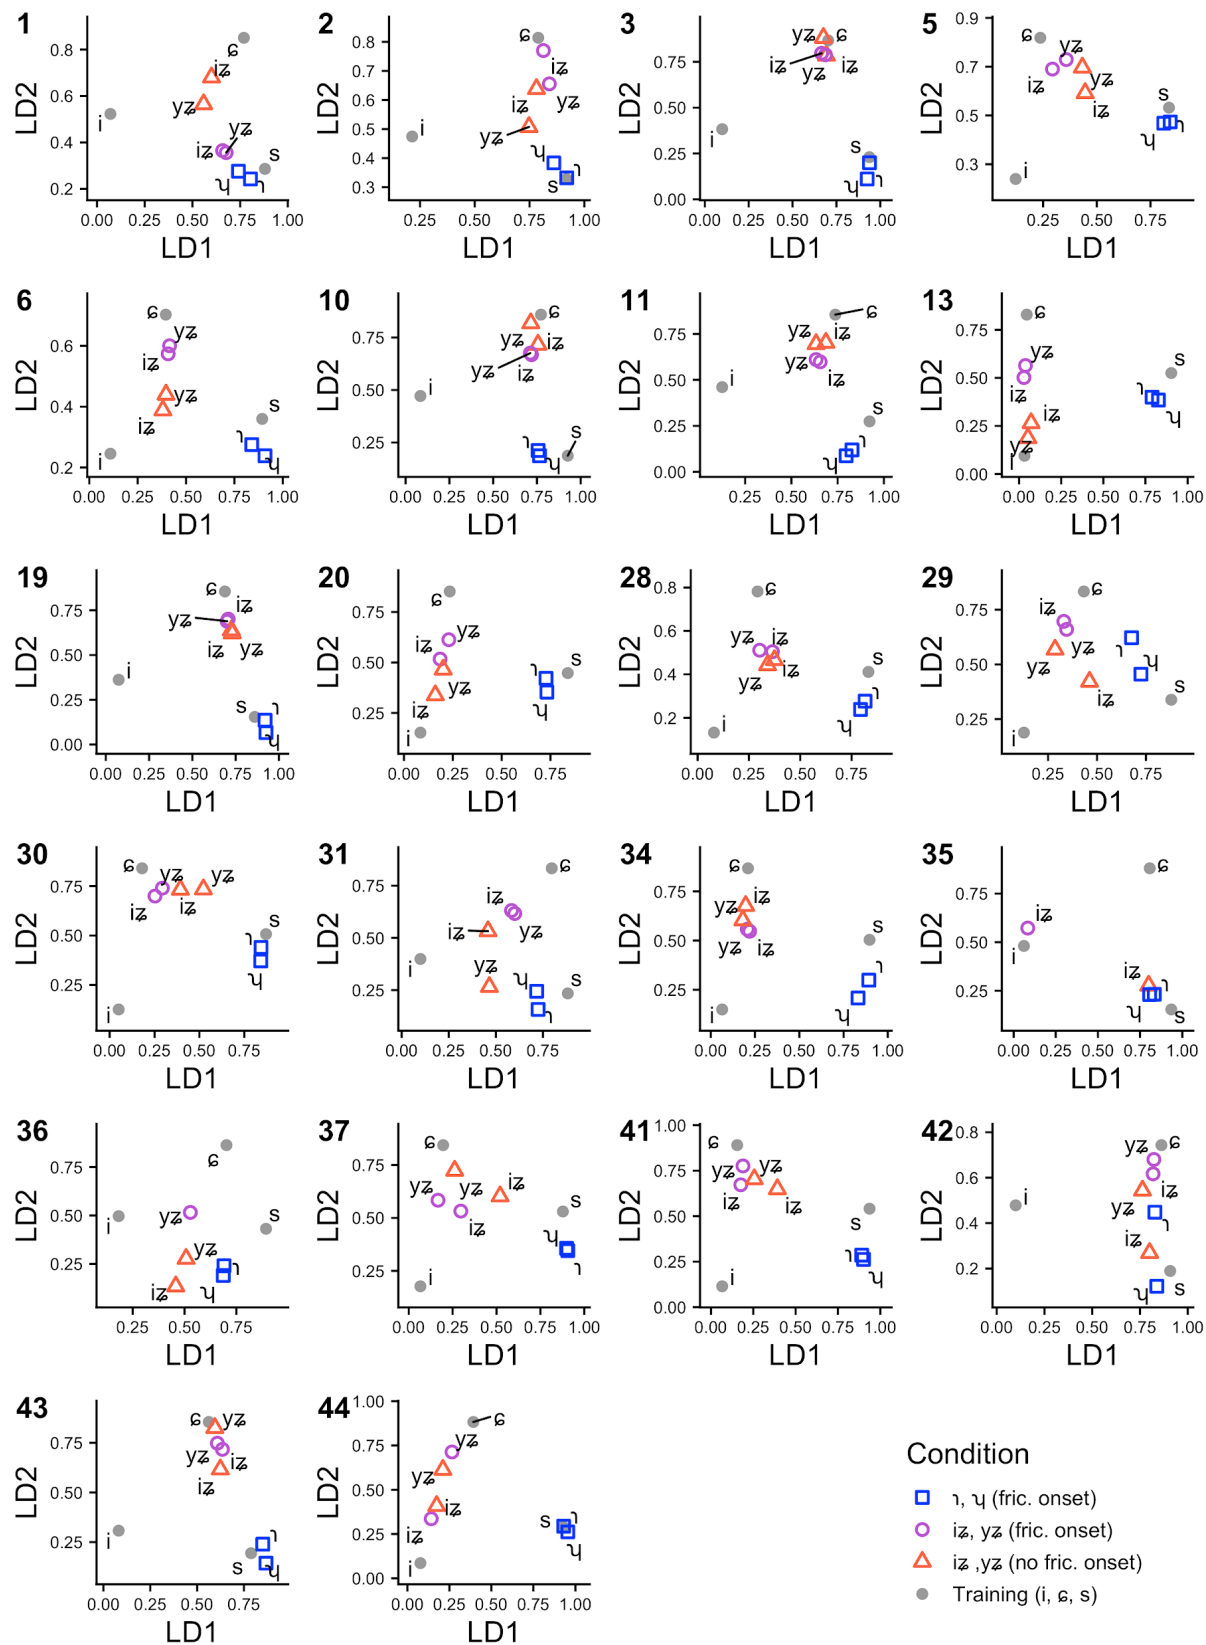

Figure 6. Range-normalized LD1-LD2 spaces for post-1985 cohort.

Table 7. /s/ distance model fixed effects.

|                     | $\beta$  | SE      | $t$    | $p(t)$  |     |
|---------------------|----------|---------|--------|---------|-----|
| Intercept           | 0.196    | 0.0223  | 8.759  | < 0.001 | *** |
| phone /iz/          | 0.392    | 0.00906 | 43.222 | < 0.001 | *** |
| phone /yɹ/          | 0.399    | 0.00989 | 40.311 | < 0.001 | *** |
| phone /ɥ/           | -0.0176  | 0.0114  | -1.540 | 0.124   |     |
| cohort              | -0.00654 | 0.0318  | -0.205 | 0.838   |     |
| cohort * phone /iz/ | -0.00800 | 0.0127  | -0.630 | 0.529   |     |
| cohort * phone /yɹ/ | 0.00693  | 0.0139  | 0.499  | 0.618   |     |
| cohort * phone /ɥ/  | -0.0101  | 0.0162  | -0.623 | 0.533   |     |

Table 8. /ɛ/ distance model fixed effects.

|                     | $\beta$ | SE     | $t$     | $p(t)$  |     |
|---------------------|---------|--------|---------|---------|-----|
| Intercept           | 0.733   | 0.0206 | 35.627  | < 0.001 | *** |
| phone /iz/          | -0.484  | 0.0101 | -47.708 | < 0.001 | *** |
| phone /yɹ/          | -0.495  | 0.0111 | -44.683 | < 0.001 | *** |
| phone /ɥ/           | -0.0411 | 0.0128 | -3.217  | < 0.01  | **  |
| cohort              | -0.119  | 0.0293 | -4.082  | < 0.001 | *** |
| cohort * phone /iz/ | 0.261   | 0.0142 | 18.334  | < 0.001 | *** |
| cohort * phone /yɹ/ | 0.228   | 0.0142 | 14.675  | < 0.001 | *** |
| cohort * phone /ɥ/  | 0.00611 | 0.0181 | 0.337   | 0.736   |     |

Table 9. /i/ distance model fixed effects.

|            | $\beta$ | SE      | $t$     | $p(t)$  |     |
|------------|---------|---------|---------|---------|-----|
| Intercept  | 0.779   | 0.0323  | 24.079  | < 0.001 | *** |
| phone /iz/ | -0.139  | 0.00935 | -14.917 | < 0.001 | *** |
| phone /yɹ/ | -0.104  | 0.0102  | -10.160 | < 0.001 | *** |

|                     |         |        |        |         |     |
|---------------------|---------|--------|--------|---------|-----|
| phone /ɹ/           | -0.0284 | 0.0118 | -2.411 | < 0.05  | *   |
| cohort              | -0.0378 | 0.0462 | -0.818 | 0.417   |     |
| cohort * phone /iɹ/ | -0.0904 | 0.0131 | -6.890 | < 0.001 | *** |
| cohort * phone /yɹ/ | -0.101  | 0.0143 | -7.047 | < 0.001 | *** |
| cohort * phone /ɹ/  | 0.0448  | 0.0167 | 2.680  | < 0.01  | **  |

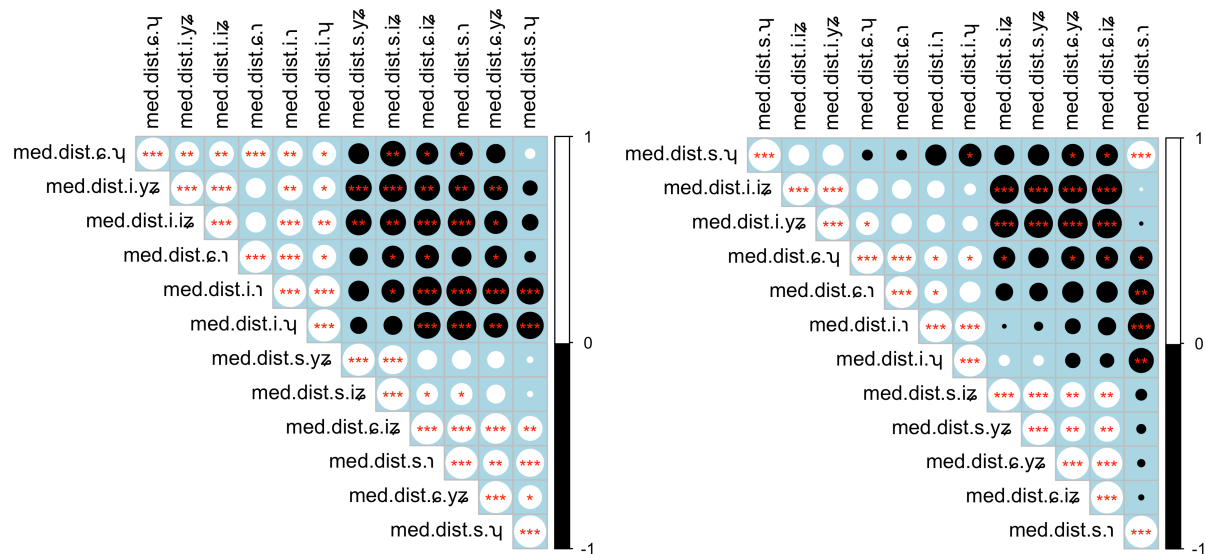

Figure 10. Correlograms for /s/, /ɛ/, and /i/ LD distance measures by phone for older cohort (L) and younger cohort (R).
